# Supplementary material for: A miR-34a-guided, tRNAiMet-derived, piR_019752-like fragment (tRiMetF31) suppresses migration and angiogenesis of breast cancer cells via targeting PFKFB3
Source: PubMed Central journal article supplement (PMC9374763; doi:10.1038/s41420-022-01054-w), 2022-08-12
Supplement: 41420_2022_1054_MOESM2_ESM.pdf [file 41420_2022_1054_MOESM2_ESM.pdf]

Original images: Figure 1D

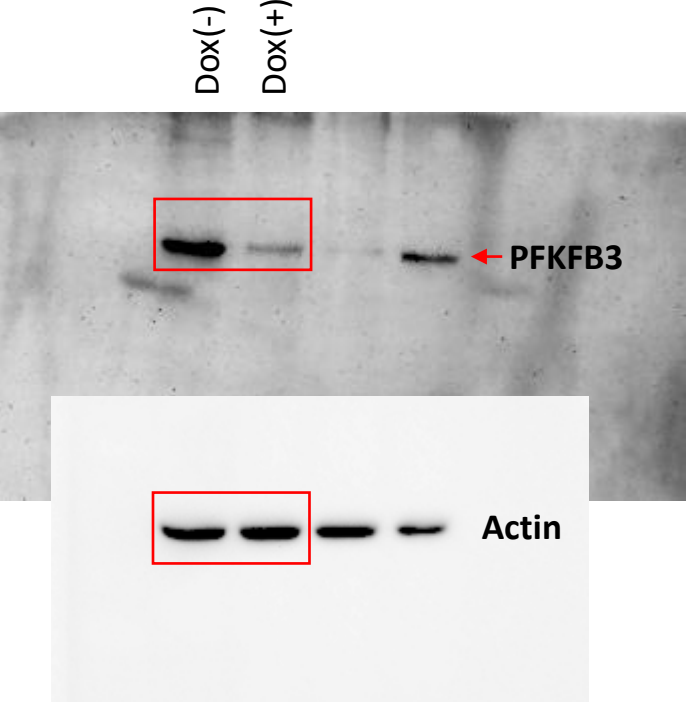

Original images: Figure 1G

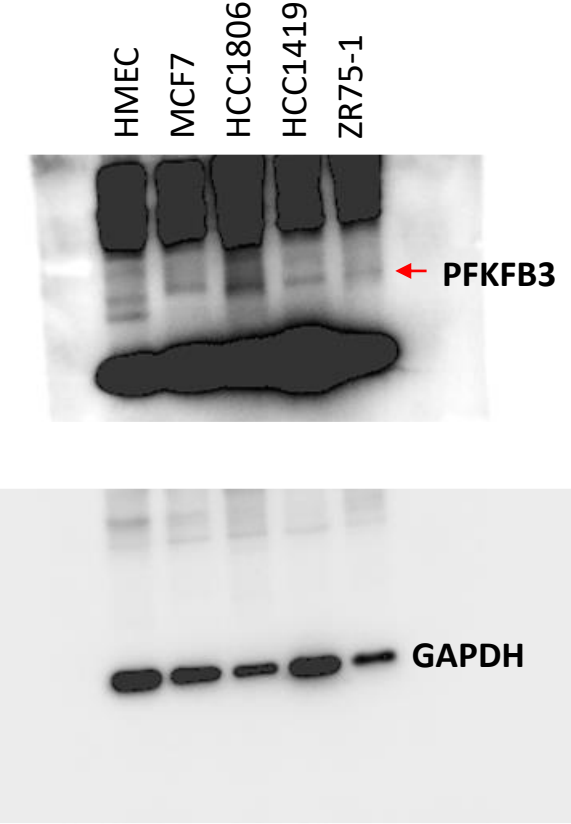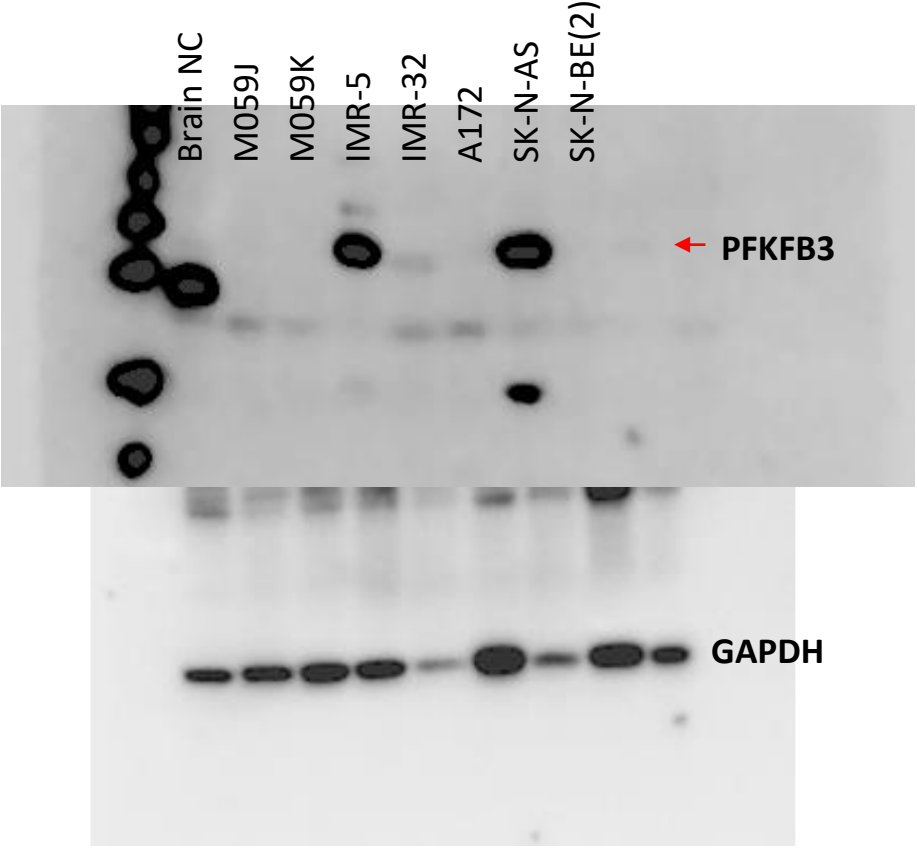

## Original images: Figure 2A

AgO2+/+  
AgO2-/-  
GFP  
mAgo2

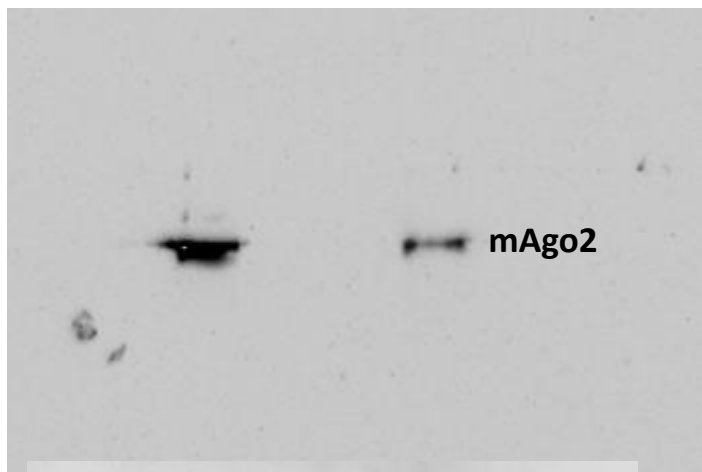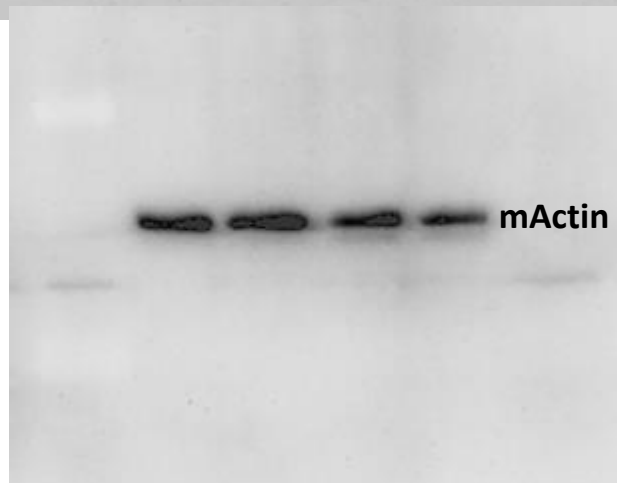

# Original images: Figure 3A

Untreated  
25 nM  
50 nM  
100 nM  
25 nM  
50 nM  
100 nM  
25 nM  
50 nM  
100 nM

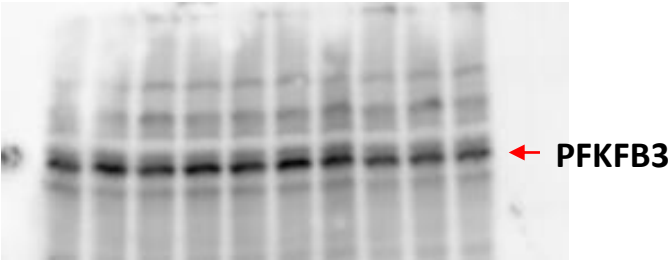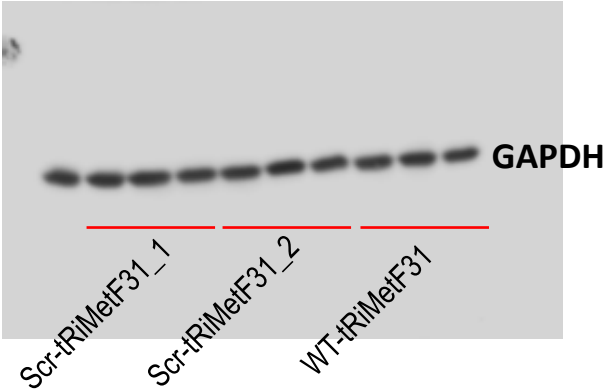

# Original images: Figure 4A

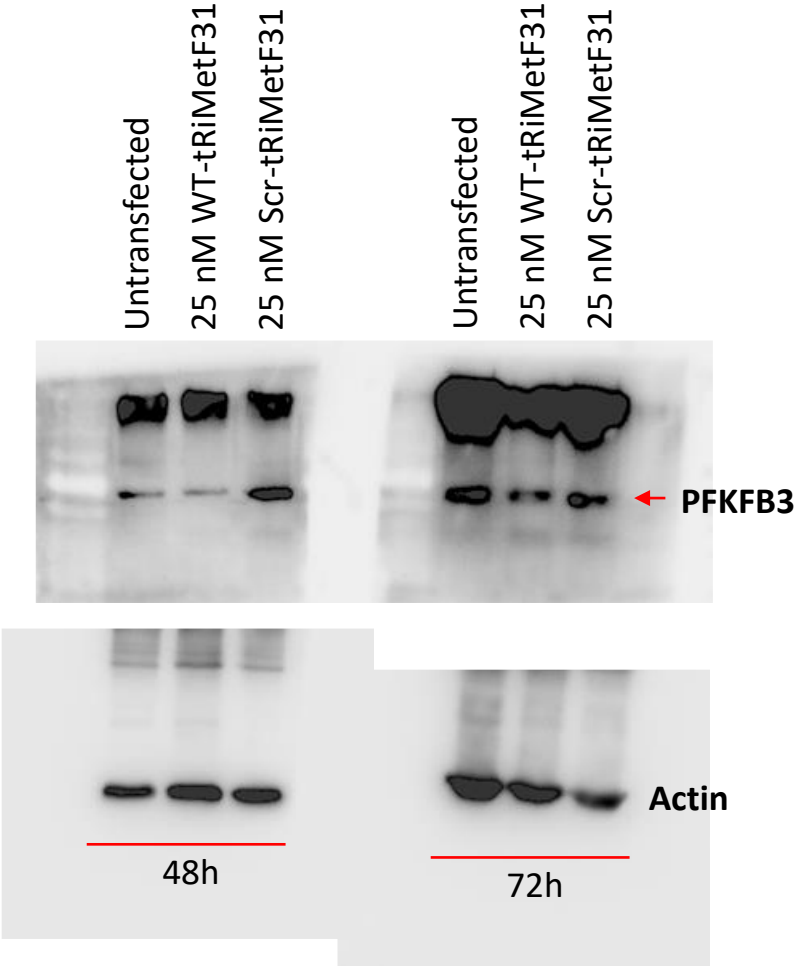

**Original images: Figure 6F**

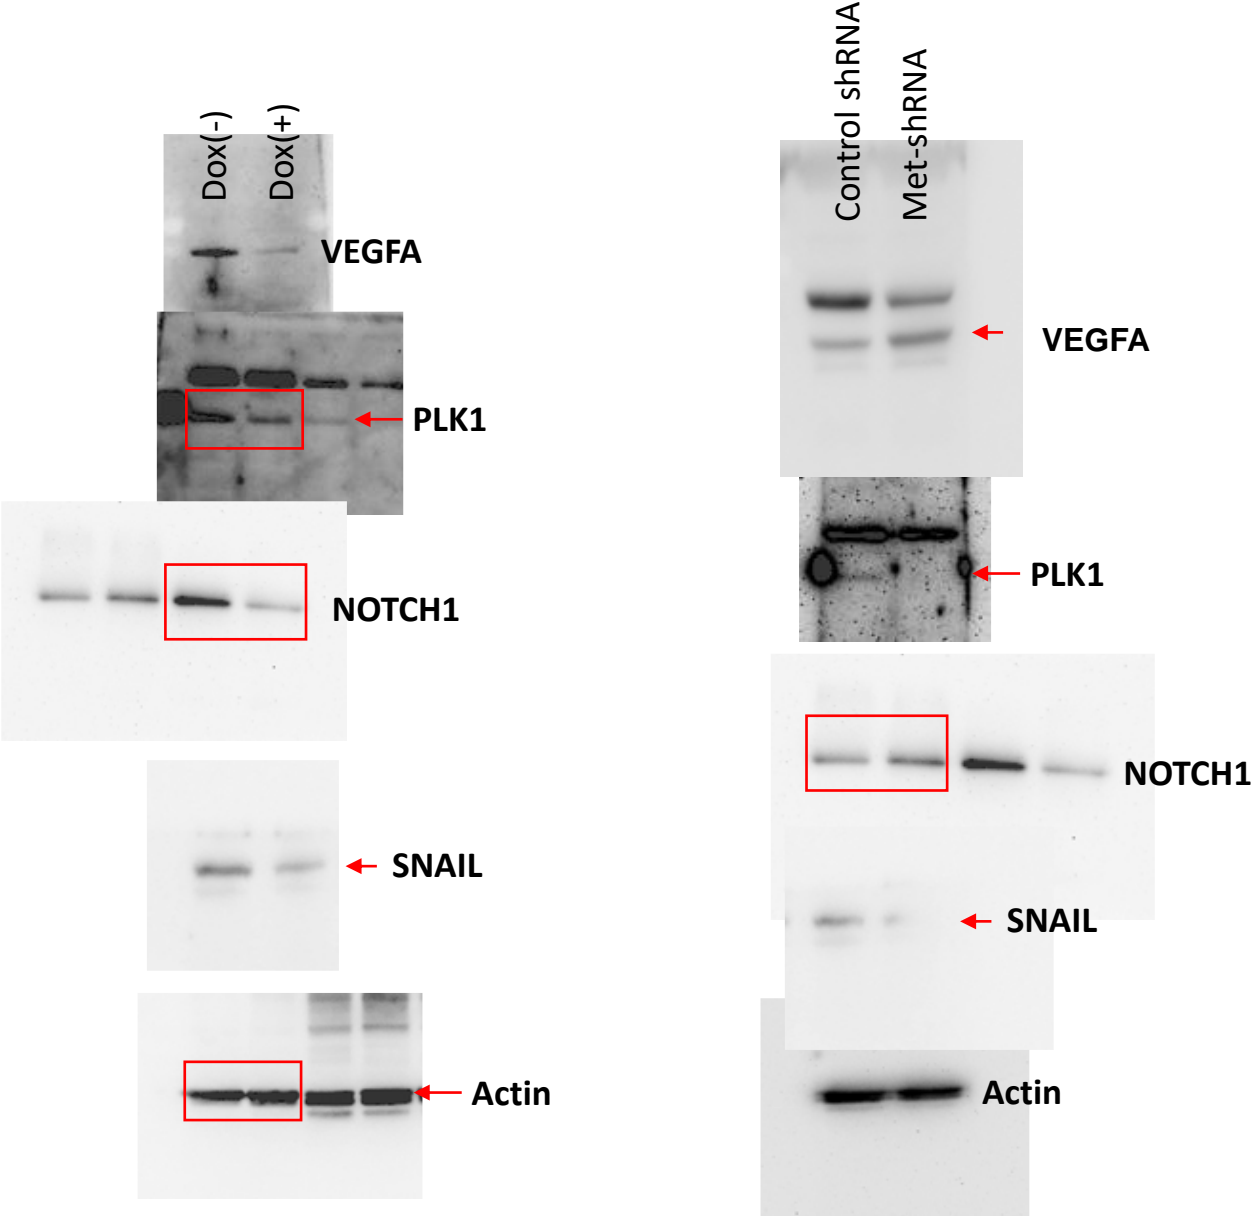

# Original images: Figure 6G

50 nM negative control siRNA  
100 nM negative control siRNA  
50 nM tRiMetF31 siRNA1  
100 nM tRiMetF31 siRNA1  
50 nM tRiMetF31 siRNA2  
100 nM tRiMetF31 siRNA2

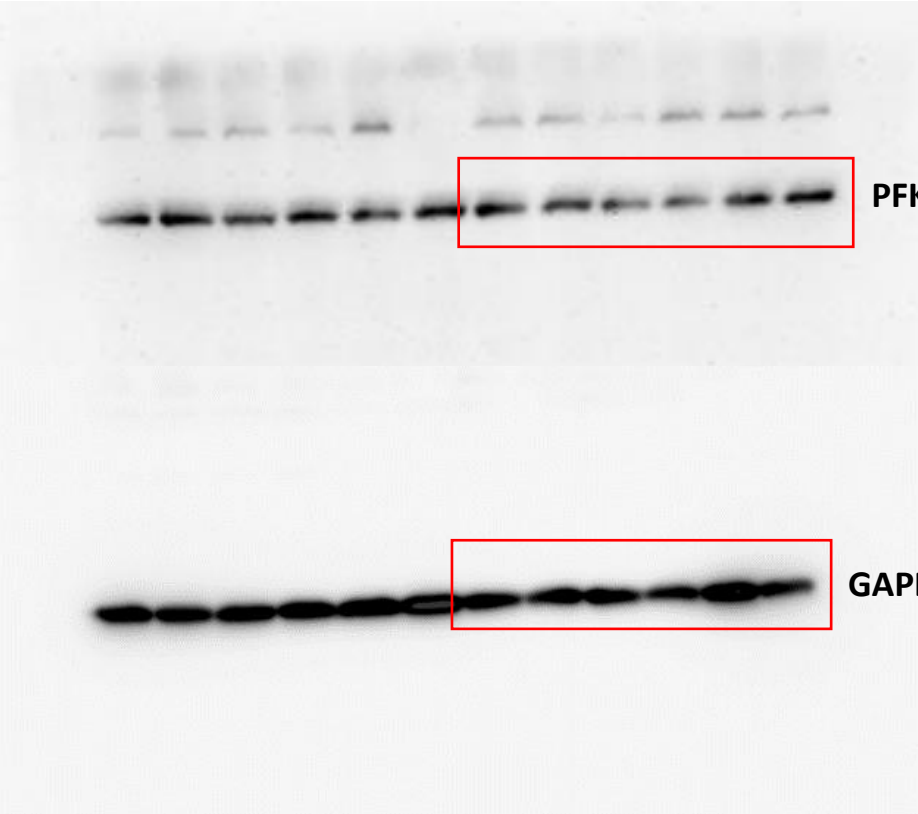

PFKFB3

GAPDH
